# Supplementary material
Source: ML conference proceedings conference paper supplement (https://openaccess.thecvf.com/content/WACV2025/html/Zhang_ARTIST_Improving_the_WACV_2025_paper.html)
Supplement: Supplementary file 1 [file Zhang_ARTIST_Improving_the_WACV_2025_supplemental.pdf]

## **A. ARTIST-Eval benchmark**

Here we provide some examples in our ARTIST-Eval benchmark:

- A vintage movie poster for Forrest Gump
- A modern movie poster for ‘Batman’
- A colorful book cover for “Iron Man”
- A minimalist movie poster for The Godfather
- An abstract movie poster for ‘Pulp Fiction’
- A gothic book cover for “Dracula”
- A romantic movie poster for The Notebook
- A futuristic movie poster for ‘Blade Runner’
- A watercolor book cover for “Pride and Prejudice”
- A playful movie poster for Finding Nemo

Our benchmark is constructed by prompting GPT-4 [28], the prompt we used is shown in Figure 8.

## **B. More Results**

## **C. Examples from the survey**

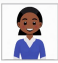

Provide 10 text instructions for movie poster and book cover design. Your response should strictly follow the following requirements:

You need to output 2 list.

The first list should contain a list of text instructions, which will be used to generate the poster or book covers, the text instructions must include the actual words to appear on the poster or cover; You can use single or double quotation mark around the actual words, there must be some examples without any quotation mark.

The second list should contain a list of actual words, which will appear on the poster or cover.

Example:

First list:

A vintage movie poster for Forrest Gump

A modern movie poster for 'Batman'

A colorful book cover for "Iron Man"

...

Second list:

Forrest Gump

Batman

Iron Man

...

You should strictly following the above example, without any revision or additional information introduced.

Figure 8. Prompt we used to construct our benchmark with GPT-4.

A vintage postage stamp showing a painting of the Golden Gate Bridge and the text 'California'

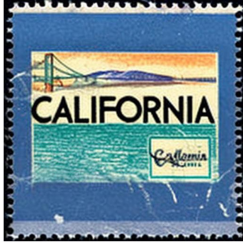

CHEER 'Mom' Cute Designer Fashion Bling Baseball Cap Turquoise Purple Pink Silver Rhinestone Pom Pom

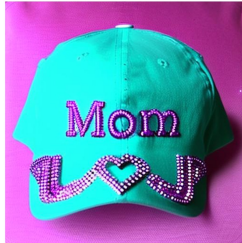

A sculpture of a brain made from wire and paper, with the words 'deep thoughts' written into the material of the brain

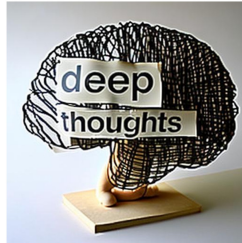

A hand painted wooden 'Pineapple Club' sign in the shape of a pineapple, hanging outside a bar

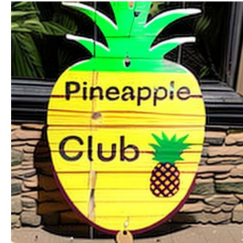

Album cover for a song named "bad habit". The song is heavy metal and is about drinking beer

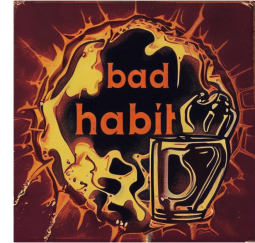

A book design with a title text of 'Angel Child'

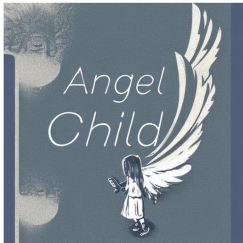

A storefront with 'Deep Learning' written on it

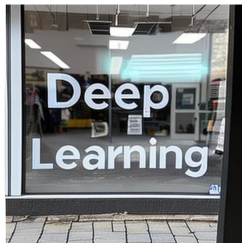

A sign that says 'Hello World'

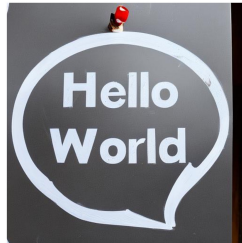

Media A 'Prayer For America'

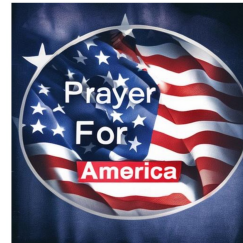

Vintage 'Easter' card Vector illustration

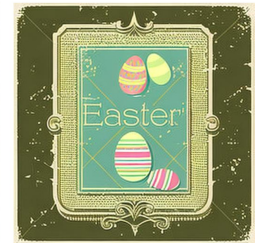

'Harvey Milk' pins.

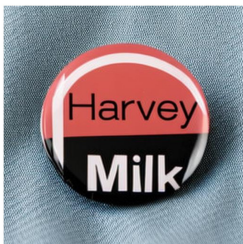

'The Spaghetti' West

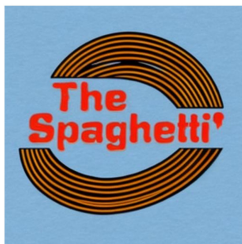

A detailed drawing, of words 'Vintage lettering'

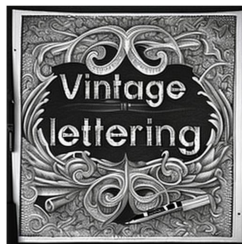

'happy birthday' card vector image

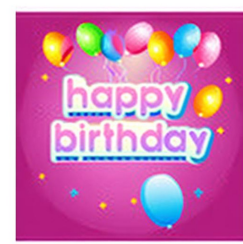

'The Elder Scrolls' Adventures Redguard Logo

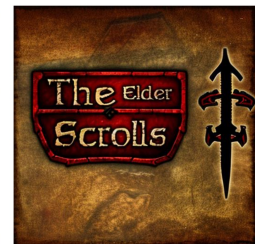

Day Digital Art Posters 'Vino' Poster by Evie Cook

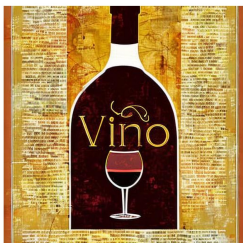

'Amsterdam' Bags Retro Bag

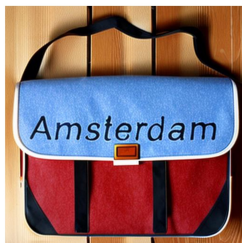

'How To Draw Kawaii Animals'

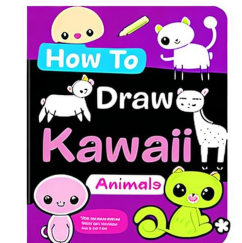

Download 'Village Quest' Game

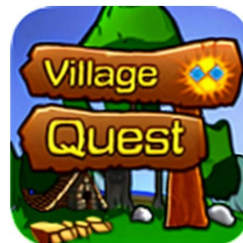

City of 'spokane' icon

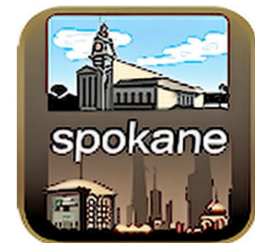

Figure 9. More generated results from the proposed framework.

Scores: 1,2,3,4 (4 is the best and multiple selections of each score are allowed)

Prompt: A sophisticated romantic business card that says 'I love you'

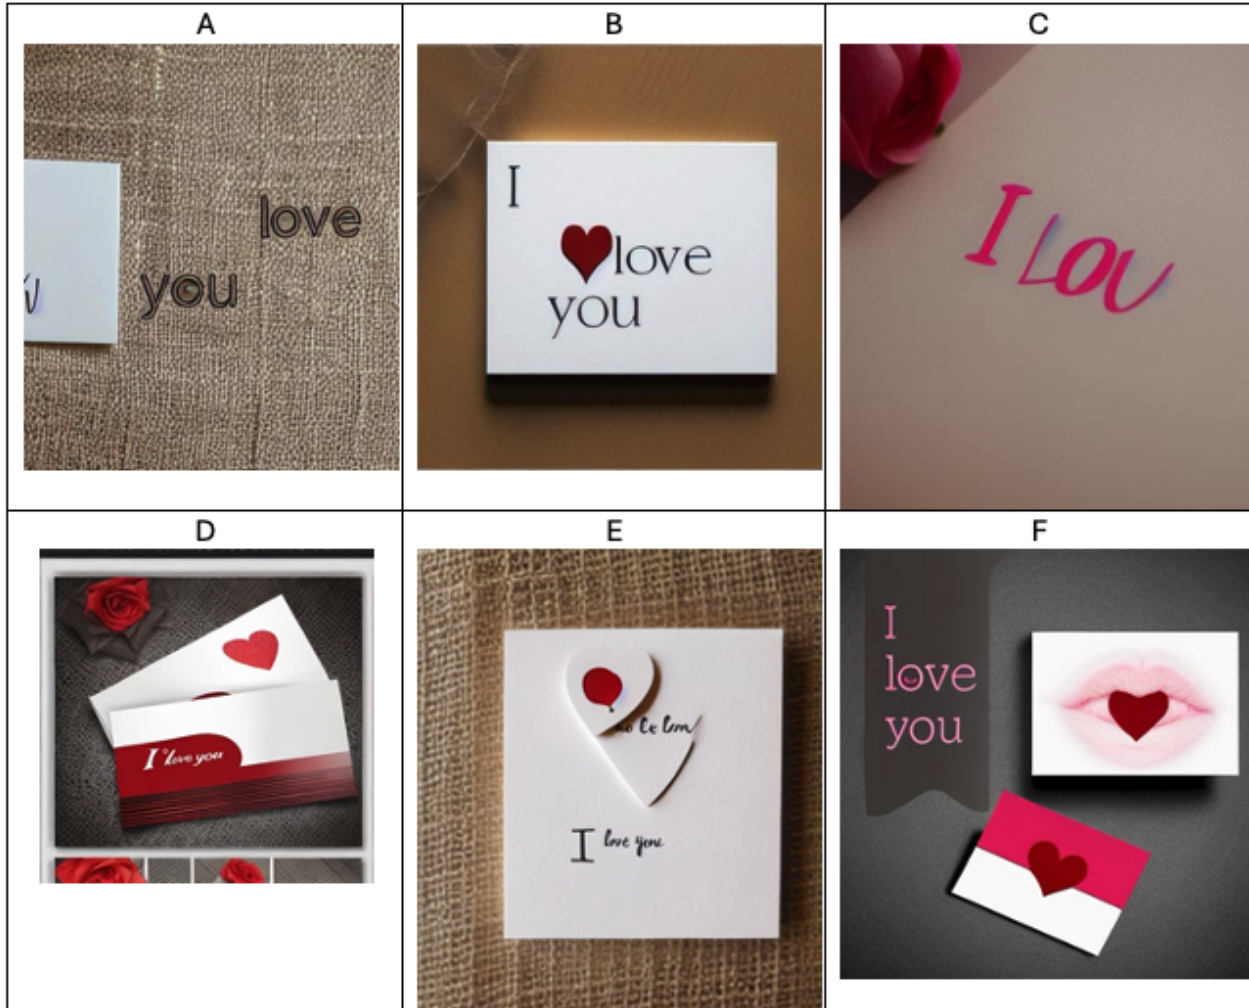

|                        | A | B | C | D | E | F |
|------------------------|---|---|---|---|---|---|
| Text rendering quality |   |   |   |   |   |   |
| Image-text matching    |   |   |   |   |   |   |

Figure 10. Example 1

Scores: 1,2,3,4 (4 is the best and multiple selections of each score are allowed)

Prompt: An action-packed movie poster for 'Indiana Jones'

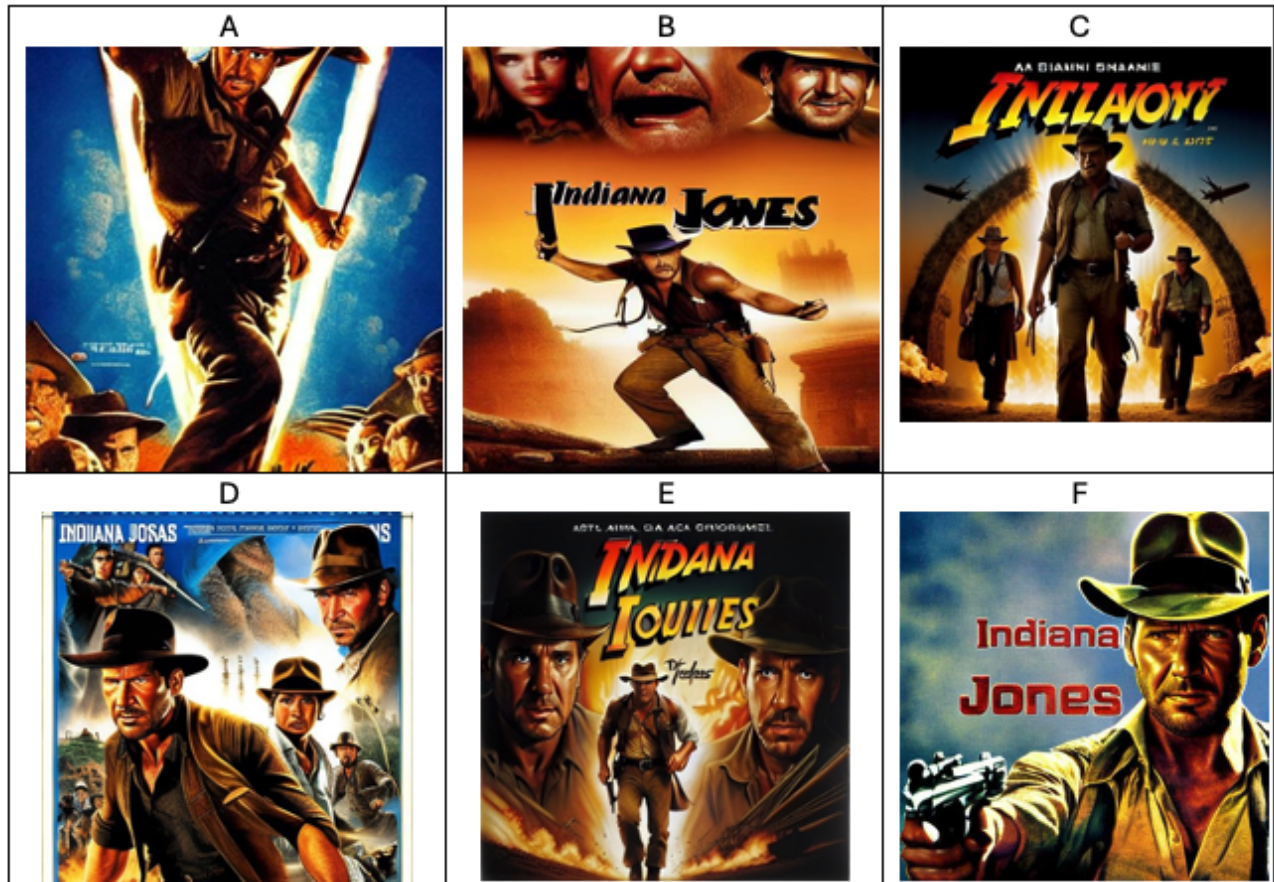

|                        | A | B | C | D | E | F |
|------------------------|---|---|---|---|---|---|
| Text rendering quality |   |   |   |   |   |   |
| Image-text matching    |   |   |   |   |   |   |

Figure 11. Example 2
